# Supplementary material for: Mortality and Cancer Incidence in Carriers of Balanced Robertsonian Translocations: A National Cohort Study
Source: PubMed Central journal article supplement — Am J Epidemiol. 2018 Dec 7;188(3):500–8. doi: 10.1093/aje/kwy266 (PMC6395160; doi:10.1093/aje/kwy266), 2018-12-07
Supplement: kwy266schoemakerwebmaterialrevised.pdf [file kwy266schoemakerwebmaterialrevised.pdf]

## **Web Material**

### **Mortality and Cancer Incidence in Carriers of Balanced Robertsonian Translocations: A National Cohort Study**

Minouk J. Schoemaker, Michael E. Jones, Craig D. Higgins, Alan F. Wright,  
the United Kingdom Clinical Cytogenetics Group, and Anthony J. Swerdlow

**Web Table 1:** Cause-specific mortality in subjects cytogenetically diagnosed with balanced Robertsonian translocations during 1962-2006 in Great Britain, for translocations involving chromosomes 13 and 14 and chromosomes 14 and 21

| ICD-9   | Cause                                        | Chromosomes involved |      |            |       |            |                   |            |       |
|---------|----------------------------------------------|----------------------|------|------------|-------|------------|-------------------|------------|-------|
|         |                                              | rob(13;14)           |      |            |       | rob(14;21) |                   |            |       |
|         |                                              | No.                  | SMR  | 95% CI     | AER   | No.        | SMR               | 95% CI     | AER   |
| 140-208 | All malignant neoplasms                      | 55                   | 0.97 | 0.73, 1.27 | -4.80 | 14         | 0.74              | 0.40, 1.24 | -52.2 |
| 240-279 | Endocrine, nutritional, metabolic, immunity  | 2                    | 0.77 | 0.09, 2.78 | -2.00 | 1          | 1.15              | 0.03, 6.41 | 1.40  |
| 290-319 | Mental disorders                             | 3                    | 0.87 | 0.18, 2.55 | -1.50 | 1          | 0.83              | 0.02, 4.60 | -2.20 |
| 320-389 | Diseases of the nervous system               | 2                    | 0.43 | 0.05, 1.55 | -8.90 | 6          | 3.68 <sup>a</sup> | 1.35, 8.01 | 46.3  |
| 390-459 | Diseases of the circulatory system           | 54                   | 0.90 | 0.68, 1.17 | -20.3 | 14         | 0.75              | 0.41, 1.26 | -48.9 |
| 460-519 | Diseases of the respiratory system           | 17                   | 0.93 | 0.54, 1.49 | -4.10 | 6          | 0.99              | 0.36, 2.15 | -0.70 |
| 520-579 | Diseases of the digestive system             | 7                    | 0.78 | 0.31, 1.60 | -6.70 | 4          | 1.38              | 0.38, 3.54 | 11.7  |
| 580-629 | Diseases of the genitourinary system         | 2                    | 0.96 | 0.12, 3.46 | -0.30 | 0          | 0.0               | 0.0, 5.38  | -7.30 |
| 710-739 | Musculoskeletal system and connective tissue | 0                    | 0.0  | 0.0, 3.77  | -3.30 | 1          | 2.81              | 0.07, 15.6 | 6.82  |
| 740-759 | Congenital anomalies                         | 2                    | 3.12 | 0.38, 11.3 | 4.50  | 1          | 4.79              | 0.12, 26.5 | 8.40  |
| 800-999 | Accidents and violence                       | 11                   | 1.18 | 0.59, 2.11 | 5.60  | 2          | 0.74              | 0.09, 2.65 | -7.70 |
| 001-999 | All causes <sup>b</sup>                      | 160                  | 0.93 | 0.79, 1.09 | -40.5 | 50         | 0.90              | 0.67, 1.18 | -60.8 |

Abbreviations: AER, absolute excess rate, number of excess deaths per 100,000 population per annum; CI, confidence interval; ICD, International Statistical Classification of diseases, 9<sup>th</sup> revision (1); SMR, standardised mortality ratio

a) two-sided P-value based on exact method  $p < 0.05$

b) The causes of five deaths in subjects diagnosed with rob(13;14) are not listed separately (2 not known, 1 senility, 1 myelodysplastic syndrome, 1 infarction of spleen)

**Web Table 2:** Cancer incidence in subjects cytogenetically diagnosed with balanced Robertsonian translocations during 1962-2006 in Great Britain, for translocations involving chromosomes 13 and 14 and chromosomes 14 and 21

| ICD-9 code                                | Cancer site                                           | rob(13;14) |                   |            | rob(14;21) |      |            |
|-------------------------------------------|-------------------------------------------------------|------------|-------------------|------------|------------|------|------------|
|                                           |                                                       | No.        | SIR               | 95% CI     | No.        | SIR  | 95% CI     |
| 140-171, 173-208                          | All malignant neoplasms <sup>a</sup>                  | 131        | 1.10              | 0.92, 1.31 | 39         | 0.98 | 0.70, 1.34 |
| 141-149                                   | Tongue, mouth, pharynx                                | 4          | 1.51              | 0.41, 3.88 | 1          | 1.22 | 0.03, 6.77 |
| 150                                       | Oesophagus                                            | 2          | 0.76              | 0.09, 2.74 | 1          | 1.14 | 0.03, 6.34 |
| 151                                       | Stomach                                               | 5          | 1.64              | 0.53, 3.82 | 1          | 1.01 | 0.03, 5.63 |
| 153, 154                                  | Colon and rectum                                      | 6          | 0.45 <sup>b</sup> | 0.17, 0.99 | 6          | 1.34 | 0.49, 2.91 |
| 155                                       | Liver                                                 | 1          | 0.85              | 0.02, 4.76 | 0          | 0.0  | 0.00, 9.45 |
| 157                                       | Pancreas                                              | 1          | 0.37              | 0.01, 2.08 | 1          | 1.09 | 0.03, 6.05 |
| 162                                       | Lung                                                  | 15         | 0.93              | 0.52, 1.54 | 4          | 0.78 | 0.21, 1.98 |
| 163                                       | Pleura                                                | 1          | 1.62              | 0.04, 9.00 | 0          | 0.0  | 0.0, 16.9  |
| 170                                       | Bone                                                  | 1          | 4.43              | 0.11, 24.7 | 0          | 0.0  | 0.0, 52.3  |
| 172                                       | Cutaneous melanoma                                    | 4          | 0.88              | 0.24, 2.24 | 3          | 1.98 | 0.41, 5.77 |
| 174, 175                                  | Breast                                                | 39         | 1.58 <sup>c</sup> | 1.12, 2.15 | 6          | 0.73 | 0.27, 1.59 |
| 179,182                                   | Corpus uteri                                          | 4          | 1.21              | 0.33, 3.09 | 0          | 0.0  | 0.0, 3.21  |
| 180                                       | Cervix                                                | 2          | 0.89              | 0.11, 3.23 | 0          | 0.0  | 0.0, 4.94  |
| 183                                       | Ovary                                                 | 3          | 0.87              | 0.18, 2.54 | 1          | 0.83 | 0.02, 4.65 |
| 184.0-184.4                               | Vagina & vulva                                        | 1          | 1.76              | 0.04, 9.80 | 0          | 0.0  | 0.0, 18.8  |
| 185                                       | Prostate                                              | 14         | 1.47              | 0.80, 2.47 | 4          | 1.18 | 0.32, 3.02 |
| 186                                       | Testis                                                | 0          | 0.0               | 0.0, 3.75  | 1          | 3.77 | 0.10, 21.0 |
| 187.1-187.4                               | Penis                                                 | 1          | 5.73              | 0.14, 31.9 | 1          | 18.4 | 0.47, 103  |
| 188                                       | Bladder and urethra                                   | 3          | 0.83              | 0.17, 2.44 | 0          | 0.0  | 0.0, 3.08  |
| 189                                       | Kidney and ureter                                     | 0          | 0.00              | 0.00, 1.23 | 0          | 0.0  | 0.0, 3.65  |
| 190                                       | Eye                                                   | 0          | 0.00              | 0.00, 14.7 | 1          | 12.6 | 0.32, 69.4 |
| 191, 192, 225, 237.5, 237.6, 237.9, 239.6 | Nervous system tumours, including benign <sup>b</sup> | 6          | 1.78              | 0.65, 3.87 | 2          | 1.78 | 0.22, 6.45 |
| 193                                       | Thyroid                                               | 0          | 0.0               | 0.0, 3.35  | 1          | 2.71 | 0.07, 15.1 |
| 196.0-199.1                               | Unknown primary site                                  | 3          | 0.79              | 0.16, 2.31 | 1          | 0.77 | 0.02, 4.27 |
| 200, 202                                  | Non-Hodgkin lymphoma                                  | 9          | 2.12              | 0.97, 4.03 | 3          | 2.10 | 0.43, 6.14 |
| 201                                       | Hodgkin disease                                       | 0          | 0.00              | 0.00, 4.66 | 1          | 3.96 | 0.10, 22.1 |
| 203                                       | Myeloma                                               | 4          | 2.87              | 0.78, 7.34 | 0          | 0.0  | 0.0, 7.60  |
| 204-208                                   | Leukaemia                                             | 4          | 1.51              | 0.41, 3.86 | 1          | 1.12 | 0.03, 6.27 |

Abbreviations: CI, confidence interval; ICD, International Statistical Classification of Diseases, 9<sup>th</sup> revision (1); SIR, standardised incidence ratio

- a) All malignant neoplasms except non-melanoma skin cancer. 1 cancer (maxillary sinus) is not listed separately under the rob(13;14).
- b) two-sided P-value based on exact method  $p < 0.05$
- c) two-sided P-value based on exact method  $p < 0.01$
- d) The 8 observed tumours included comprise 4 malignant cancers of the brain and 4 benign neoplasms of the meninges. For England and Wales, benign nervous system neoplasms were included from the year 1971 for Scotland, from the year 2000.

**Web Table 3:** Incidence of cancer overall and of haematological malignancies in subjects cytogenetically diagnosed with balanced Robertsonian translocations during 1962-2006 in Great Britain, by age at cytogenetic diagnosis

| ICD-9 code            | Cause                                | Age at cytogenetic diagnosis (years) |      |            |       |      |            |       |      |            |
|-----------------------|--------------------------------------|--------------------------------------|------|------------|-------|------|------------|-------|------|------------|
|                       |                                      | 0-14                                 |      |            | 15-44 |      |            | 45-84 |      |            |
|                       |                                      | No.                                  | SIR  | 95% CI     | No.   | SIR  | 95% CI     | No.   | SIR  | 95% CI     |
| 140-171, 173-200, 202 | All malignant neoplasms <sup>a</sup> | 5                                    | 1.07 | 0.35, 2.50 | 104   | 1.09 | 0.89, 1.32 | 93    | 1.01 | 0.82, 1.24 |
| 201                   | Non-Hodgkin lymphoma                 | 1                                    | 4.24 | 0.11, 23.6 | 7     | 1.93 | 0.78, 3.98 | 5     | 1.66 | 0.54, 3.88 |
| 203                   | Hodgkin disease                      | 1                                    | 4.51 | 0.11, 25.1 | 0     | 0.0  | 0.0, 4.43  | 0     | 0.0  | 0.0, 17.2  |
| 204-208               | Myeloma                              | 0                                    | 0.0  | 0.0, 162   | 3     | 3.16 | 0.65, 9.23 | 1     | 0.76 | 0.02, 4.25 |
|                       | Leukaemia                            | 2                                    | 6.99 | 0.85, 25.2 | 3     | 1.53 | 0.32, 4.47 | 1     | 0.48 | 0.01, 2.69 |

Abbreviations: CI, confidence interval; ICD, International Statistical Classification of diseases, 9<sup>th</sup> revision (1); SIR, standardised incidence ratio

a) All malignant neoplasms except non-melanoma skin cancer

## References

1. WHO. *International Statistical Classification of diseases and related health problems, 9th revision*. Geneva: World Health Organization; 1977.
